# Supplementary material for: Utility of Polymerase Chain Reaction in Nasopharyngeal Swabs for Identifying Respiratory Bacteria Causing Community-Acquired Pneumonia
Source: PubMed Central journal article supplement (PMC9241648; doi:10.1128/spectrum.00379-22), 2022-05-18
Supplement: spectrum.00379-22-s001.pdf [file spectrum.00379-22-s001.pdf]

**Supplementary Table 1:** All microbiology results of participants (n = 118) by standard microbiology (SM) procedures (culture and PCR of any respiratory sample, hemoculture, urinary antigens) and *FilmArray® Pneumonia Panel plus* in the lower respiratory tract (FA-LRT) or nasopharyngeal (FA-NP) sample.

|                                    | SM ; n (%) | FA-LRT ; n (%) | FA-NP ; n (%) |
|------------------------------------|------------|----------------|---------------|
| No pathogen detected               | 52 (44)    | 14 (12)        | 21 (18)       |
| <b>Bacteria</b>                    |            |                |               |
| Any bacteria                       | 46 (39)    | 90 (76)        | 73 (62)       |
| Haemophilus influenzae             | 19 (16)*   | 44 (37)        | 27 (23)       |
| Staphylococcus aureus              | 7 (5.9)*   | 29 (25)        | 28 (24)       |
| Streptococcus pneumoniae           | 12 (10)†   | 19 (16)        | 11 (9.3)      |
| Moraxella catarrhalis              | 0          | 14 (12)        | 9 (7.6)       |
| Escherichia coli                   | 4 (3.4)*   | 11 (9.3)       | 2 (1.7)       |
| Streptococcus agalactiae           | 0          | 8 (6.8)        | 0             |
| Pseudomonas aeruginosa             | 3 (2.5)*   | 7 (5.9)        | 0             |
| Klebsiella pneumoniae              | 1 (0.8)*   | 5 (4.2)        | 1 (0.8)       |
| Enterobacter cloacae complex       | 0          | 4 (3.4)        | 1 (0.8)       |
| Mycoplasma pneumoniae              | 1 (0.8)    | 4 (3.4)        | 4 (3.4)       |
| Streptococcus pyogenes             | 2 (2.2)*   | 3 (2.5)        | 2 (1.7)       |
| Klebsiella oxytoca                 | 1 (0.8)*   | 4 (3.4)        | 1 (0.8)       |
| Klebsiella aerogenes               | 1 (0.8)*   | 3 (2.5)        | 0             |
| Serratia marcescens                | 1 (0.8)*   | 3 (2.5)        | 0             |
| Proteus spp                        | 0          | 1 (0.8)        | 2 (1.7)       |
| Chlamydia pneumoniae               | 1 (0.8)    | 1 (0.8)        | 1 (0.8)       |
| Legionella pneumophila             | 0          | 1 (0.8)        | 0             |
| Other bacteria ‡                   | 6          | -              | -             |
| <b>Viruses</b>                     |            |                |               |
| Any virus                          | 28 (24)    | 67 (57)        | 57 (48)       |
| Human Rhinovirus Enterovirus       | -          | 29 (25)        | 22 (19)       |
| Influenza A or B                   | 12 (10)    | 17 (14)        | 12 (10)       |
| Coronavirus                        | -          | 9 (7.6)        | 7 (5.9)       |
| Respiratory Syncytial Virus        | 9 (7.6)    | 10 (8.5)       | 10 (8.5)      |
| Parainfluenza Virus                | -          | 6 (5.1)        | 5 (4.2)       |
| Human Metapneumovirus              | -          | 7 (5.9)        | 5 (4.2)       |
| Adenovirus                         | -          | 0              | 0             |
| SARS-CoV-2                         | 2 (2.2)    | -              | -             |
| <b>Antibiotics Resistance Gene</b> |            |                |               |
| CTXM                               | -          | 5 (4.2)        | 1 (0.8)       |
| mecAC and MREJ                     | -          | 2 (1.7)        | 3 (2.5)       |
| MERS                               | -          | 0              | 0             |
| IMP                                | -          | 0              | 0             |

|             |   |         |   |
|-------------|---|---------|---|
| KPC         | - | 0       | 0 |
| NDM         | - | 0       | 0 |
| OXA 48 like | - | 1 (0.8) | 0 |
| VIM         | - | 1 (0.8) | 0 |

\* diagnostic by LRT culture; † positive test : urine antigen (6), LRT culture (10), blood culture (2); ‡ diagnostic by positive PCR on naso-pharyngeal swab, † Streptococcus gr. anginosus (4), Neisseria perflava (1), Staphylococcus epidermidis (1)

**Supplementary Table 2:** Performance of *In house* PCR in naso-pharyngeal (NP) swabs at different cut off ( $\geq 10^2$  and  $\geq 10^3$ ) and *FilmArray® Pneumonia Panel plus* (FilmArray PP) in NP swabs for detection of *S. pneumoniae* and *H. influenzae* in adults with community-acquired respiratory tract infections (n=118 patients) compared to different reference standard : *FilmArray® Pneumonia Panel plus* on a good quality lower respiratory tract (LRT) sample with positive cut-off value  $>10^4$  copy/ml, or with the standard microbiology results. Positive percent agreement (PPA), negative percent agreement (NPA), **overall percent agreement** (OPA), positive likelihood ratio (LR+), negative likelihood ratio (LR-), positive predictive value (PPV), negative predictive value (NPV).

| Target organism      | Reference standard                          | Diagnostic test                        | NP sample + | Reference standard + | PPA  | NPA  | OPA  | LR +     | LR - | PPV  | NPV  |  |
|----------------------|---------------------------------------------|----------------------------------------|-------------|----------------------|------|------|------|----------|------|------|------|--|
| <i>S. pneumoniae</i> | LRT PCR<br><i>FilmArray</i> PP              |                                        |             |                      |      |      |      |          |      |      |      |  |
|                      |                                             | NP PCR In-House $\geq 10^2$            | 15          | 19                   | 0.68 | 0.98 | 0.93 | 33.87    | 0.32 | 0.87 | 0.94 |  |
|                      |                                             | NP PCR In-House $\geq 10^3$            | 12          | 19                   | 0.58 | 0.99 | 0.92 | 57.32    | 0.43 | 0.92 | 0.92 |  |
|                      |                                             | NP PCR <i>FilmArray</i> PP $\geq 10^4$ | 11          | 19                   | 0.58 | 1    | 0.93 | Infinite | 0.42 | 1    | 0.93 |  |
|                      | Standard microbiology                       |                                        |             |                      |      |      |      |          |      |      |      |  |
|                      |                                             | NP PCR In-House $\geq 10^2$            | 15          | 12                   | 0.67 | 0.93 | 0.91 | 10.1     | 0.36 | 0.53 | 0.96 |  |
|                      |                                             | NP PCR In-House $\geq 10^3$            | 12          | 12                   | 0.58 | 0.95 | 0.92 | 12.37    | 0.44 | 0.58 | 0.95 |  |
|                      |                                             | NP PCR <i>FilmArray</i> PP $\geq 10^4$ | 11          | 12                   | 0.58 | 0.96 | 0.92 | 15.46    | 0.43 | 0.64 | 0.95 |  |
|                      |                                             |                                        |             |                      |      |      |      |          |      |      |      |  |
| <i>H. influenzae</i> | LRT PCR<br><i>FilmArray</i> PP <sup>4</sup> |                                        |             |                      |      |      |      |          |      |      |      |  |
|                      |                                             | NP PCR In-House $\geq 10^2$            | 50          | 44                   | 0.77 | 0.78 | 0.78 | 3.57     | 0.29 | 0.68 | 0.85 |  |
|                      |                                             | NP PCR In-House $\geq 10^3$            | 35          | 44                   | 0.64 | 0.91 | 0.81 | 6.73     | 0.4  | 0.8  | 0.81 |  |
|                      |                                             | NP PCR <i>FilmArray</i> PP $\geq 10^4$ | 27          | 44                   | 0.61 | 1    | 0.86 | Infinite | 0.39 | 1    | 0.81 |  |
|                      | Standard microbiology                       |                                        |             |                      |      |      |      |          |      |      |      |  |
|                      |                                             | NP PCR In-House $\geq 10^2$            | 50          | 19                   | 0.89 | 0.67 | 0.70 | 2.68     | 0.16 | 0.34 | 0.97 |  |
|                      |                                             | NP PCR In-House $\geq 10^3$            | 35          | 19                   | 0.79 | 0.8  | 0.80 | 3.91     | 0.26 | 0.43 | 0.95 |  |
|                      | NP PCR <i>FilmArray</i> PP $\geq 10^4$      | 27                                     | 19          | 0.74                 | 0.87 | 0.85 | 5.61 | 0.3      | 0.52 | 0.95 |      |  |
